# Supplementary material for: Identification of prefrontal cortex protein alterations in Alzheimer’s disease
Source: PubMed Central journal article supplement (PMC5834268; doi:10.18632/oncotarget.24303), 2018-01-24
Supplement: oncotarget-09-10847-s001.pdf [file oncotarget-09-10847-s001.pdf]

## Identification of prefrontal cortex protein alterations in Alzheimer's disease

### SUPPLEMENTARY MATERIALS

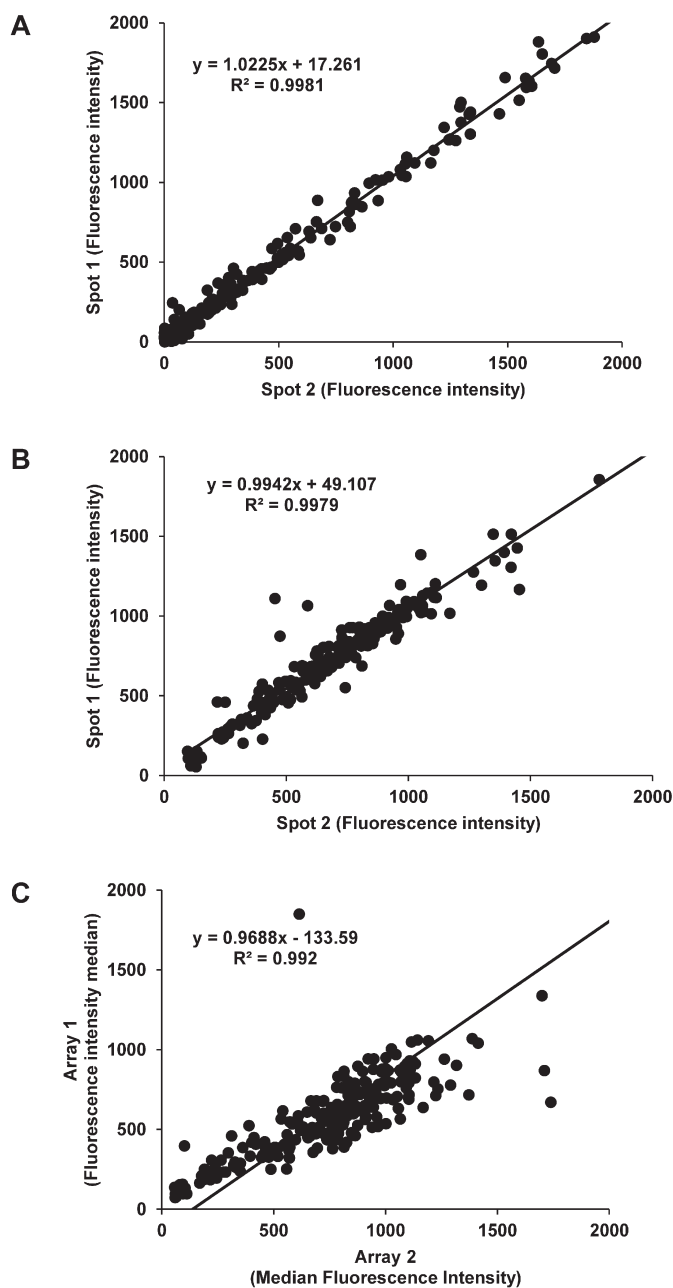

**Supplementary Figure 1: Performance analysis of the microarrays.** Intra-array reproducibility was determined by plotting the fluorescence intensity of duplicate spots of antibodies printed on Sigma Panorama (A) and RayBio L-series (B) antibody microarrays. (C) Inter-array reproducibility was calculated using the median fluorescence intensities of two different Sigma Panorama antibody microarrays probed with the swapping experiment. All samples to be tested onto RayBio L-series antibody microarrays were labeled with biotin, and then a swapping experiment was not needed.

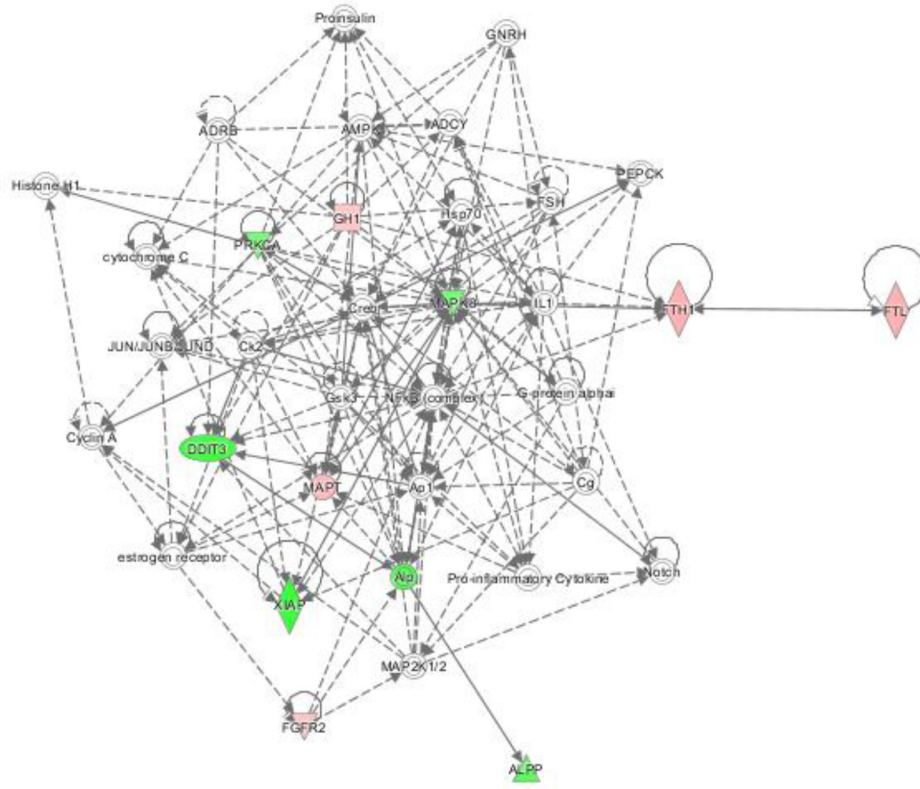

**Supplementary Figure 2: Ingenuity pathway analysis of the antibody microarray data.** Cell death and survival was the other most affected network identified by IPA using the 40 differentially expressed proteins identified in the study. Up-regulated proteins are shown in red, down-regulated proteins in green, uncolored proteins are proposed by IPA.

**Supplementary Table 1: Sociodemographic and neuropathological data of all subjects included in the study.** See Supplementary\_Table\_1

**Supplementary Table 2: Antibodies and reagents used for the validation of the protein alteration in the study by WB and IHC**

| Provider                                                 | Protein           | Reference     | Clonality  | Source | WB      | IHC   |
|----------------------------------------------------------|-------------------|---------------|------------|--------|---------|-------|
| Abnova                                                   | TOPORS            | H00010210-M01 | Monoclonal | Mouse  | 1:1000  | 1:500 |
| Assay Biotechnology                                      | DDIT3             | C0202         | Polyclonal | Rabbit | 1:500   |       |
| GeneTex                                                  | AMBP              | GTX101068     | Polyclonal | Rabbit | 1:1000  |       |
| Human Protein Atlas                                      | SSTR-2            | HPA074834     | Polyclonal | Rabbit | 1:500   |       |
| Human Protein Atlas                                      | MBL2              | HPA002027     | Polyclonal | Rabbit | 1:500   | 1:100 |
| Human Protein Atlas                                      | DDIT3             | HPA068416     | Polyclonal | Rabbit |         | 1:100 |
| Human Protein Atlas                                      | MICB              | HPA013733     | Polyclonal | Rabbit | 1:500   | 1:600 |
| Human Protein Atlas                                      | FURIN             | HPA067869     | Polyclonal | Rabbit | 1:500   |       |
| Human Protein Atlas                                      | FTL               | HPA073112     | Polyclonal | Rabbit | 1:1000  |       |
| Human Protein Atlas                                      | ANXA7             | HPA063190     | Polyclonal | Rabbit |         | 1:50  |
| Santa Cruz Biotechnologies                               | XIAP              | sc-8789       | Polyclonal | Goat   | 1:500   | 1:100 |
| Santa Cruz Biotechnologies                               | Chromogranin-A    | sc-1488       | Polyclonal | Goat   | 1:25    |       |
| Santa Cruz Biotechnologies                               | LGALS3BP          | sc-365338     | Monoclonal | Mouse  | 1:1000  |       |
| Sigma                                                    | $\alpha$ -tubulin | T9026         | Monoclonal | Mouse  | 1:5000  |       |
| HRP-labeled secondary antibodies or HRP-labeled reagents |                   |               |            |        |         |       |
| BioRad                                                   | HRP anti-rabbit   |               | Polyclonal | Goat   | 1:3000  |       |
| Dako                                                     | HRP anti-mouse    |               | Polyclonal | Goat   | 1:2500  |       |
| Jackson                                                  | HRP anti-goat     |               | Polyclonal | Rabbit | 1:10000 |       |
| RayBiotech                                               | HRP-streptavidin  |               | -          |        | 1:1000  |       |
